# Supplementary material
Source: ML conference proceedings conference paper supplement (https://proceedings.neurips.cc/paper_files/paper/2018/hash/734e6bfcd358e25ac1db0a4241b95651-Abstract.html)
Supplement: Supplementary file 1 [file 734e6bfcd358e25ac1db0a4241b95651-Supplemental.zip]

Archive with 1 entries (1 files):
- brist_long_ver.pdf
